# Supplementary material
Source: PubMed Central journal article supplement (PMC3946297)
Supplement: NIHMS549097-supplement-1_si_001.pdf [file NIHMS549097-supplement-1_si_001.pdf]

Supporting Information for:

## **Differentiation of Cancer Cell Origin and Molecular Subtype by Plasma Membrane N-Glycan Profiling**

Serenus Hua<sup>1†</sup>, Mary Saunders<sup>2†</sup>, Lauren M. Dimapasoc<sup>3</sup>, Seung Hyup Jeong<sup>4</sup>, Bum Jin Kim<sup>4</sup>,  
Jae Han Kim<sup>5</sup>, Kit S. Lam<sup>2</sup>, Carlito B. Lebrilla<sup>2,3</sup>, and Hyun Joo An<sup>1,4\*</sup>

<sup>1</sup> Cancer Research Institute, Chungnam National University, Daejeon, 305-764, South Korea

<sup>2</sup> Dept. of Biochemistry and Molecular Medicine, University of California, Davis, 95616, USA

<sup>3</sup> Dept. of Chemistry, University of California, Davis, 95616, USA

<sup>4</sup> Graduate School of Analytical Science and Technology, Chungnam National University,  
Daejeon, 305-764, South Korea

<sup>5</sup> Dept. of Food Nutrition, Chungnam National University, Daejeon, 305-764, South Korea

### **TABLE OF CONTENTS:**

**Figure S1:** Lack of correlation between glycan signals found in one cancerous and one non-cancerous breast cell lines

**Figure S2:** Correlation between glycan signals found in two cervical carcinoma cell lines

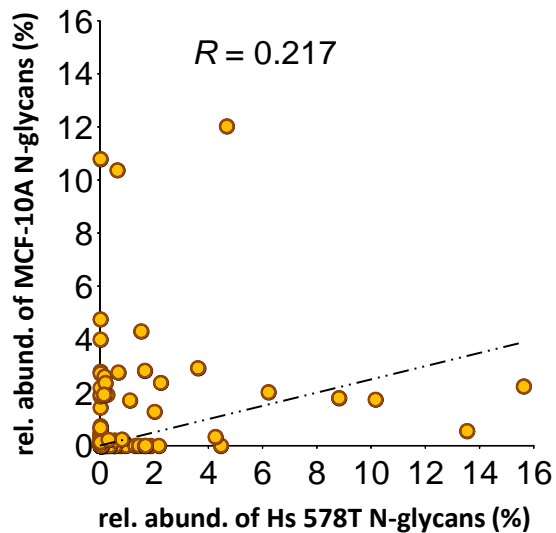

**Figure S1:** Scatterplot showing the relative abundances of each glycan signal in the cancerous Hs-578T vs non-cancerous MCF-10A breast cell lines. Each point represents an individual glycan signal. Pearson correlation coefficient ( $R$ ) is calculated based on the best-fit line.

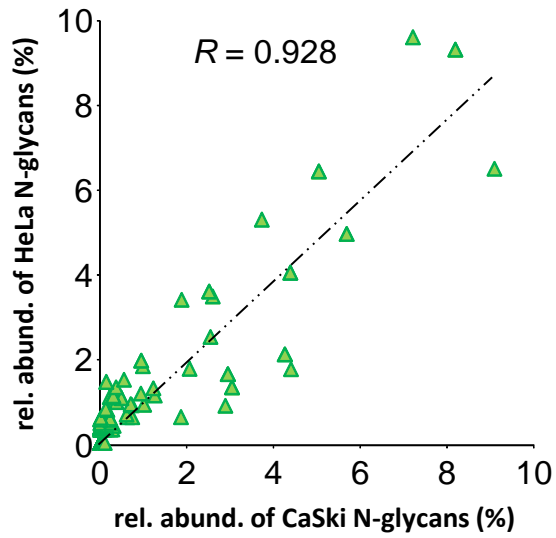

**Figure S2:** Scatterplot showing the relative abundances of each glycan signal in the CaSki vs HeLa cervical carcinoma cell lines. Each point represents an individual glycan signal. Pearson correlation coefficient ( $R$ ) is calculated based on the best-fit line.
